# Supplementary material
Source: PubMed Central journal article supplement (PMC3612649)
Supplement: 1221442110_pnas.201221442SI.pdf [file 1221442110_pnas.201221442SI.pdf]

# Supporting Information

Lee et al. 10.1073/pnas.1221442110

## SI Materials and Methods

**General Synthetic Procedures.** All reactions were carried out under an argon atmosphere with dry solvents under anhydrous conditions unless otherwise noted. Reaction yields refer to chromatographically and spectroscopically ( $^1\text{H}$  NMR) homogeneous materials unless otherwise stated. Reagents were used without further purification unless otherwise stated. Silica gel 60 (particle size = 0.040–0.063 mm; Merck) was used for flash column chromatography. NMR spectra were recorded on Bruker DRX-500 or AMX-400 or Varian Inova-400 instruments and calibrated using residual undeuterated solvent as an internal reference. The following abbreviations were used to explain multiplicities: br, broad; d, doublet; m, multiplet; q, quartet; quin, quintuplet; s, singlet; sep, septet; sext, sextet; t, triplet. Infrared (IR) spectra were recorded on a Perkin-Elmer 1600 series FT-IR Spectrometer. Electrospray ionization MS (ESI-MS) experiments were performed on an API 100 Perkin-Elmer SCIEX Single Quadrupole Mass Spectrometer at 4,000 V emitter voltage. High-resolution mass spectra (HRMS) were recorded on a VG ZAB-ZSE mass spectrometer using ESI. Reactions for the synthesis of facial amphiphiles (FAs) intermediates were drawn in Scheme S1.

**3 $\alpha$ ,7 $\alpha$ ,12 $\alpha$ -Trihydroxycholane (1).** To MeOH (900 mL) and acetic acid (100 mL) solution at room temperature, cholic acid (50 g) and NaOMe (20 g) in portions were added. Kolbe electrolysis was carried out using 4.5 V (*ca.* 1.5 A) direct current with two platinum meshes (2  $\times$  2 cm) spaced  $\sim$ 2–3 mm apart. The reaction was run for  $\sim$ 40 h, and then, 900 mL water were added to the mixture within 10 min. The mixture was stirred for 0.5 h and then filtered to give a white solid as the crude product ( $\sim$ 85% purity). Recrystallization in MeOH-H<sub>2</sub>O gave **1** (17 g, 35%) with  $>$ 95% purity.

$^1\text{H}$  NMR (500 MHz, CDCl<sub>3</sub>)  $\delta$  = 3.99 (brs, 1H), 3.84 (brs, 1H), 3.45–3.41 (m, 1H), 3.18 (m, 1H), 2.71 (brs, 1H), 2.63 (m, 1H), 2.20–2.15 (m, 2H), 1.95–1.03 (m, 22H), 0.97–0.85 (m, 9H), 0.73 (s, 3H).  $^{13}\text{C}$  NMR (125 MHz, CDCl<sub>3</sub>):  $\delta$  = 73.6, 72.3, 68.9, 47.9, 46.8, 42.1, 41.9, 40.0, 38.6, 35.8, 35.8, 35.1, 35.0, 30.7, 28.4, 28.0, 26.8, 23.6, 22.9, 19.7, 18.1, 14.9, 12.9.

**3 $\alpha$ ,7 $\alpha$ ,12 $\alpha$ -Tri(2-Propenyloxy)-Cholane (2) (General Procedure for Allylation).** To a solution of **1** (17 g, 45 mmol) in dry tetrahydrofuran (THF, 200 mL), NaH (60% in mineral oil, 8 g, 0.2 mol) at 0  $^\circ\text{C}$  was added. The mixture was slowly warmed to room temperature and stirred for 1 h, and then, allyl iodide was added (33 g, 0.2 mol). After overnight reaction, saturated NH<sub>4</sub>Cl solution was added. The organic phase was extracted with EtOAc, washed with brine, and dried over Na<sub>2</sub>SO<sub>4</sub>. After filtration and removal of solvent in vacuo, the residue was purified by silica column chromatography to give **2** (19 g, 85%).

$^1\text{H}$  NMR (500 MHz, CDCl<sub>3</sub>)  $\delta$  = 6.05–5.95 (m, 3H), 5.36–5.28 (m, 3H), 5.22–5.14 (m, 3H), 4.16–4.14 (m, 2H), 4.08–4.07 (m, 2H), 3.88–3.79 (m, 2H), 3.62 (brs, 1H), 3.40 (brs, 1H), 3.24–3.20 (m, 1H), 2.35–1.01 (m, 24H), 0.98–0.92 (m, 9H), 0.73 (s, 3H).  $^{13}\text{C}$  NMR (125 MHz, CDCl<sub>3</sub>):  $\delta$  = 136.5, 136.3, 116.6, 115.8, 115.8, 81.2, 79.5, 75.3, 69.8, 69.7, 69.1, 47.0, 46.7, 42.9, 42.4, 40.2, 38.7, 36.0, 35.8, 35.4, 29.3, 28.4, 28.1, 27.9, 23.7, 23.4, 19.7, 18.2, 15.0, 13.0.

**3 $\alpha$ ,7 $\alpha$ ,12 $\alpha$ -Tri(2-Hydroxyethoxy)-Cholane (3) (General Procedure for Ozonolysis and Reduction).** At  $-78$   $^\circ\text{C}$ , ozone was bubbled into a solution of **2** (19 g, 38 mmol) in CH<sub>2</sub>Cl<sub>2</sub> (100 mL) and MeOH (100 mL) until blue color persisted. Excess ozone was removed with a stream of oxygen until the blue color disappeared. Me<sub>2</sub>S

(20 mL, 0.27 mol) was then added, and the reaction was stirred for 0.5 h. After adding NaBH<sub>4</sub> (10 g, 0.26 mol) in 5% NaOH solution (100 mL), the reaction was slowly warmed to room temperature and stirred overnight. The reaction was carefully quenched with 2 N HCl solution to pH 5–6 followed by removal of organic solvent in vacuo. The remaining aqueous solution was extracted with EtOAc, and the organic layer was washed with brine and dried over Na<sub>2</sub>SO<sub>4</sub>. After filtration and removal of solvent in vacuo, the residue was purified by column chromatography to give **3** (15 g, 77%).

$^1\text{H}$  NMR (500 MHz, CDCl<sub>3</sub>)  $\delta$  = 3.82–3.70 (m, 8H), 3.66–3.61 (m, 3H), 3.43–3.39 (m, 2H), 3.28 (brs, 1H), 3.22 (brs, 1H), 3.05 (brs, 3H), 2.25–1.05 (m, 24H), 0.98–0.93 (m, 9H), 0.75 (s, 3H);  $^{13}\text{C}$  NMR (125 MHz, CDCl<sub>3</sub>)  $\delta$  = 81.3, 80.0, 76.8, 70.5, 69.5, 62.6, 62.5, 62.4, 47.1, 46.7, 42.1, 38.7, 35.6, 35.2, 28.3, 27.6, 23.2, 18.4, 14.9, 12.9.

**3 $\alpha$ -Benzyloxy-7 $\alpha$ ,12 $\alpha$ -Dihydroxycholane 4.** To a solution of **1** (17 g, 45 mmol) in dry THF (200 mL) held at 0  $^\circ\text{C}$ , NaH (60% in mineral oil, 6 g, 0.15 mol) in portions and Bu<sub>4</sub>NI (1 g, 3 mmol) were added. The reaction was warmed to room temperature and stirred for 1 h, and then, BnBr (7 mL, 60 mmol) was added by syringe pump over 10 h. After proceeding overnight, the reaction was carefully quenched with water. The solution was extracted with EtOAc. The organic layer was washed sequentially with 2N HCl, saturated NaHCO<sub>3</sub> solution and brine, and dried over Na<sub>2</sub>SO<sub>4</sub>. After filtration and removal of solvent in vacuo, the residue was purified by column chromatography to give **4** (15 g, 70%).

$^1\text{H}$  NMR (500 MHz, CDCl<sub>3</sub>)  $\delta$  = 7.43–7.33 (m, 5H), 4.66–4.60 (m, 2H), 4.06 (brs, 1H), 3.90 (brs, 1H), 3.32–3.30 (m, 1H), 2.34–2.29 (m, 2H), 1.95–1.12 (m, 24H), 1.05–0.97 (m, 9H), 0.76 (s, 3H);  $^{13}\text{C}$  NMR (125 MHz, CDCl<sub>3</sub>)  $\delta$  = 139.6, 128.7, 128.0, 127.7, 79.1, 73.4, 70.0, 68.7, 48.0, 46.9, 42.4, 35.8, 35.6, 35.4, 35.0, 28.0, 27.2, 23.0, 18.1, 14.9, 13.0.

3 $\alpha$ -Benzyloxy-7 $\alpha$ ,12 $\alpha$ -di-(2-propenyloxy)-cholane (**5**) was synthesized from **4** according to the general allylation procedure above. Yield: 89%;  $^1\text{H}$  NMR (500 MHz, CDCl<sub>3</sub>)  $\delta$  = 7.44–7.34 (m, 5H), 6.05–5.98 (m, 2H), 5.41–5.31 (m, 2H), 5.21–5.16 (m, 2H), 4.66–4.63 (m, 2H), 4.16–4.14 (m, 2H), 3.91–3.77 (m, 2H), 3.63 (s, 1H), 3.42 (d, *J* = 3.0 Hz, 1H), 3.32–3.27 (m, 1H), 2.42–1.05 (m, 26H), 1.02–0.97 (m, 9H), 0.75 (s, 3H);  $^{13}\text{C}$  NMR (125 MHz, CDCl<sub>3</sub>)  $\delta$  = 139.7, 136.2, 136.2, 128.4, 127.6, 127.4, 115.6, 115.6, 81.0, 79.3, 75.0, 69.7, 69.5, 69.4, 46.7, 46.5, 42.7, 42.2, 40.0, 38.5, 35.7, 35.6, 35.2, 29.0, 28.2, 27.8, 27.7, 23.4, 23.4, 23.2, 19.5, 18.0, 14.8, 12.7.

3 $\alpha$ -Benzyloxy-7 $\alpha$ ,12 $\alpha$ -di-(2-hydroxyethoxy)-cholane (**6**) was synthesized from **5** according to the general ozonolysis/reduction procedure. Yield: 78%;  $^1\text{H}$  NMR (500 MHz, CDCl<sub>3</sub>)  $\delta$  = 7.33–7.24 (m, 5H), 4.54 (s, 2H), 3.79–3.65 (m, 6H), 3.56 (s, 1H), 3.27–3.13 (m, 4H), 2.21–1.02 (m, 26H), 0.94–0.84 (m, 9H), 0.68 (s, 3H);  $^{13}\text{C}$  NMR (125 MHz, CDCl<sub>3</sub>)  $\delta$  = 139.2, 128.3, 127.5, 127.3, 81.0, 78.8, 76.3, 69.9, 69.8, 69.3, 62.3, 62.2, 46.6, 46.4, 41.8, 38.2, 35.2, 34.9, 27.9, 27.4, 22.8, 18.0, 14.5, 12.5.

7 $\alpha$ ,12 $\alpha$ -Di-(2-propenyloxy)-cholane (**7**) was synthesized from 7 $\alpha$ ,12 $\alpha$ -dihydroxycholane (**1**) according to the general allylation procedure. Yield: 92%;  $^1\text{H}$  NMR (500 MHz, CDCl<sub>3</sub>)  $\delta$  = 5.97–5.88 (m, 2H), 5.33–5.22 (m, 2H), 5.11–5.06 (m, 2H), 4.08–4.04 (m, 2H), 3.81–3.67 (m, 2H), 3.55 (brs, 1H), 3.31 (brs, 1H), 2.20–1.04 (m, 24H), 0.91–0.86 (m, 9H), 0.66 (s, 3H);  $^{13}\text{C}$  NMR (125 MHz, CDCl<sub>3</sub>)  $\delta$  = 136.5, 115.6, 81.4, 75.8, 69.6, 69.5, 47.0, 46.7, 43.1, 38.7, 36.0, 35.8, 28.5, 28.1, 23.6, 22.0, 18.2, 15.0, 13.0.

7 $\alpha$ ,12 $\alpha$ -Di-(2-hydroxyethoxy)-cholane (**8**) was synthesized from **7** according to the general ozonolysis/reduction procedure. Yield: 87%;  $^1\text{H}$  NMR (500 MHz,  $\text{CDCl}_3$ )  $\delta$  = 3.76–3.65 (m, 6H), 3.58 (brs, 1H), 3.35–3.33 (m, 23H), 3.24–3.21 (m, 1H), 2.27 (brs, 2H), 2.14–1.02 (m, 26H), 0.92–0.86 (m, 9H), 0.69 (s, 3H);  $^{13}\text{C}$  NMR (125 MHz,  $\text{CDCl}_3$ )  $\delta$  = 81.0, 75.8, 69.6, 69.0, 62.3, 62.3, 46.7, 46.3, 42.7, 39.6, 35.4, 35.4, 27.9, 27.6, 22.9, 18.0, 14.5, 12.5.

**7 $\alpha$ ,12 $\alpha$ -Di-((O- $\beta$ -D-Maltopyranosyl)Ethoxy)-Cholane (FA-2; General Procedure for Glycosylation).** A suspension of **8** (1.0 g, 2.2 mmol), 1-thio-ethyl-hepta-O-benzoyl- $\beta$ -D-maltoside (9.0 g, 8.0 mmol), and 4 Å molecular sieves (2 g) in anhydrous  $\text{CH}_2\text{Cl}_2$  (100 mL) were stirred for 30 min at room temperature. After cooling the solution to  $-30^\circ\text{C}$ , crystallized *N*-iodosuccinimide (1.8 g, 8.0 mmol) and silver trifluorosulfonate (563 mg, 2.2 mmol) were added. The reaction was slowly warmed to room temperature and stirred overnight. After filtration through a pad of celite, the reaction mixture was quenched with saturated  $\text{Na}_2\text{S}_2\text{O}_3$  solution and extracted with  $\text{CH}_2\text{Cl}_2$ . The organic layer was washed with brine and dried over  $\text{Na}_2\text{SO}_4$ . After filtration and removal of solvent in vacuo, the residue was passed through a short silica gel column to give crude syrup, which was used directly without additional purification.

To a solution of the above residue in dry  $\text{CH}_2\text{Cl}_2$  (50 mL) and MeOH (50 mL), NaOMe (500 mg) was added. The reaction mixture was stirred overnight and then neutralized with Dowex 50WX2 ion exchange resin. After filtration and removal of solvent in vacuo, the residue was purified by column chromatography to give a white solid FA-2 (1.78 g, 72% over two steps).

$^1\text{H}$  NMR (500 MHz,  $\text{CD}_3\text{OD}$ )  $\delta$  = 5.14 (d,  $J$  = 5.0 Hz, 1H), 5.13 (d,  $J$  = 5.0 Hz, 1H), 4.38 (d,  $J$  = 9.5 Hz, 2H) 4.00–3.15 (m, 34H), 2.20–0.85 (m, 35H), 0.67 (s, 3H);  $^{13}\text{C}$  NMR (500 MHz,  $\text{CD}_3\text{OD}$ )  $\delta$  = 104.0, 102.8, 81.2, 81.2, 77.7, 77.6, 76.4, 74.7, 74.6, 74.0, 62.6, 48.5, 47.8, 47.4, 45.0, 40.8, 36.8, 36.4, 24.2, 20.3, 18.6, 15.0, 13.0; HRMS: calculated for  $\text{C}_{52}\text{H}_{90}\text{O}_{24}\text{Na}^+$  [ $\text{M} + \text{Na}^+$ ]: 1,121.5714, found 1,121.5696; IR = 3,374, 2,934, 1,107  $\text{cm}^{-1}$ .

**3 $\alpha$ -Hydroxyl-7 $\alpha$ ,12 $\alpha$ -di-((O- $\beta$ -D-Maltopyranosyl)Ethoxy)-Cholane (FA-3).** FA-3 was synthesized from **6** according to a procedure similar to the synthesis of FA-2, except that an additional hydrogenation step was conducted to remove the benzyl protective groups. Hydrogenation was conducted in MeOH in the presence of 10% Pd/C. FA-3 was purified by column chromatography as a white solid (56% over three steps).

$^1\text{H}$  NMR (500 MHz,  $\text{CD}_3\text{OD}$ )  $\delta$  = 5.16 (d,  $J$  = 4.0 Hz, 1H), 5.15 (d,  $J$  = 3.5 Hz, 1H), 4.49 (d,  $J$  = 7.5 Hz, 1H), 4.40 (d,  $J$  = 7.5 Hz, 1H), 4.00–3.15 (m, 35H), 2.20–0.88 (m, 33H), 0.71 (s, 3H);  $^{13}\text{C}$  NMR (500 MHz,  $\text{CD}_3\text{OD}$ )  $\delta$  = 104.1, 103.9, 103.0, 102.9, 83.1, 81.4, 77.7, 76.5, 75.1, 74.8, 74.2, 73.0, 71.5, 69.9, 69.5, 69.4, 68.8, 62.8, 62.2, 48.4, 48.0, 47.4, 44.2, 43.4, 41.0, 39.6, 36.8, 35.6, 31.5, 29.8, 29.5, 28.7, 24.2, 23.4, 20.4, 18.6, 15.0, 13.0; HRMS: calculated for  $\text{C}_{52}\text{H}_{91}\text{O}_{24}^+$  [ $\text{M} + \text{H}^+$ ]: 1,115.5771, found 1,115.5834; IR = 3,371, 2,928, 2,866, 2,359, 1,372, 1,075, 1,035  $\text{cm}^{-1}$ .

3 $\alpha$ ,7 $\alpha$ ,12 $\alpha$ -Tri-((O- $\beta$ -D-maltopyranosyl)ethoxy)-cholane (FA-4) was synthesized from **3** using a procedure similar to the synthesis of FA-2. Yield: 67% over two steps; white solid.

$^1\text{H}$  NMR (500 MHz,  $\text{CD}_3\text{OD}$ )  $\delta$  = 5.21–5.18 (m, 3H), 4.40 (d,  $J$  = 8.0 Hz, 1H), 4.39 (d,  $J$  = 8.0 Hz, 1H), 4.36 (d,  $J$  = 8.0 Hz, 1H), 4.10–3.20 (m, 51H), 2.31–0.88 (m, 33H), 0.70 (s, 3H);  $^{13}\text{C}$  NMR (125 MHz,  $\text{CD}_3\text{OD}$ ):  $\delta$  = 103.3, 103.2, 101.9, 101.82, 101.8, 81.9, 80.7, 80.3, 80.2, 80.1, 76.9, 76.8, 76.7, 76.5, 75.6, 75.5, 75.4, 74.1,

74.0, 73.8, 73.7, 73.6, 73.1, 70.6, 70.5, 70.4, 69.1, 68.9, 68.1, 67.8, 67.3, 61.8, 61.4, 61.3, 61.2, 46.9, 46.4, 43.1, 42.3, 39.9, 38.6, 35.9, 35.3, 35.1, 34.9, 28.6, 28.5, 27.7, 27.4, 23.4, 23.2, 22.3, 19.3, 17.0, 14.0, 12.0; HRMS: calculated for  $\text{C}_{66}\text{H}_{114}\text{O}_{36}\text{Na}^+$  [ $\text{M} + \text{Na}^+$ ]: 1,505.6982, found 1,505.6971; IR = 3,351, 2,930, 2,496, 2,238, 2,072, 1,368, 1,119, 1,035, 983  $\text{cm}^{-1}$ .

3 $\alpha$ ,7 $\alpha$ ,12 $\alpha$ -Tri-((O- $\beta$ -D-glucopyranosyl)ethoxy)-cholane (FA-5) was synthesized according to the general glycosylation procedure from the reaction of **3** and 1-thio-ethyl-tetra-(O-benzoyl)- $\beta$ -D-glucoside. Yield: 66% over two steps; white solid.

$^1\text{H}$  NMR (500 MHz,  $\text{CD}_3\text{OD}$ )  $\delta$  = 4.41 (d,  $J$  = 8.0 Hz, 1H), 4.37 (d,  $J$  = 8.0 Hz, 1H), 4.34 (d,  $J$  = 8.0 Hz, 1H), 4.10–3.15 (m, 33H), 2.31–0.95 (m, 30H), 0.90 (t,  $J$  = 7.0 Hz, 3H), 0.72 (s, 3H);  $^{13}\text{C}$  NMR (125 MHz,  $\text{CD}_3\text{OD}$ ): 104.5, 104.2, 83.0, 81.7, 78.1, 78.1, 78.0, 77.9, 77.8, 77.6, 75.2, 75.2, 75.1, 71.7, 71.6, 70.1, 69.9, 69.7, 69.1, 68.9, 68.3, 62.8, 63.0, 47.5, 36.9, 35.9, 23.4, 18.6, 15.0, 13.0 ppm; HRMS: calculated for  $\text{C}_{48}\text{H}_{84}\text{O}_{21}\text{Na}^+$  [ $\text{M} + \text{Na}^+$ ]: 1,019.5397, found 1,019.5400; IR = 3,361, 2,929, 2,868, 2,490, 2,072, 1,458, 1,368, 1,163, 1,076, 983, 618  $\text{cm}^{-1}$ .

**7 $\alpha$ ,12 $\alpha$ -Di-(((2-(Trimethylamino)Ethyl)Phosphoryl)Ethoxy)-Cholane (FA-6).** To a solution of **8** (1.0 g, 2.2 mmol) and  $\text{Et}_3\text{N}$  (0.72 mL, 5.0 mmol) in dry toluene (50 mL), ethylene chlorophosphate (0.42 mL, 4.6 mmol) at  $0^\circ\text{C}$  was added. The reaction was then warmed to room temperature and stirred for 1 h. Precipitated salt was filtered out and washed with dry toluene (50 mL). The filtrate was concentrated in vacuo, and the crude residue was used directly without additional purification.

A solution of the above residue in dry acetonitrile (100 mL) in a sealed tube was cooled with a dry ice/acetone bath during addition of  $\text{Me}_3\text{N}$  (10 mL). The reaction was then maintained at  $70^\circ\text{C}$  for 24 h. After removal of solvent in vacuo, the residue was purified by column chromatography to give FA-6 as a white solid (1.14 g, 64% over two steps).

$^1\text{H}$  NMR (400 MHz,  $\text{CD}_3\text{OD}$ )  $\delta$  = 4.36 (brs, 4 H), 4.05–4.00 (m, 4H), 3.80–3.69 (m, 6H), 3.58 (s, 1H), 3.42–3.36 (m, 3H), 3.25 (s, 18H), 2.20–1.02 (m, 23H), 0.97 (d,  $J$  = 6.8 Hz, 3H), 0.93 (s, 3H), 0.88 (t,  $J$  = 6.8 Hz, 3H), 0.72 (s, 3H);  $^{13}\text{C}$  NMR (100 MHz,  $\text{CD}_3\text{OD}$ ):  $\delta$  = 82.0, 76.9, 68.3, 66.4, 66.3, 66.2, 65.6, 65.3, 65.1, 59.5, 53.8, 53.7, 53.6, 46.6, 44.1, 43.3, 40.0, 38.8, 37.7, 36.5, 35.5, 29.3, 29.0, 28.5, 27.9, 27.8, 23.3, 21.8, 19.7, 17.6, 14.0, 12.1; HRMS: calculated for  $\text{C}_{38}\text{H}_{74}\text{N}_2\text{O}_{10}\text{P}_2\text{Na}^+$  [ $\text{M} + \text{Na}^+$ ]: 803.4711, found 803.4730; IR = 3,356, 2,927, 2,866, 1,473, 1,074, 1,033, 670  $\text{cm}^{-1}$ .

**3 $\alpha$ -Hydroxyl-7 $\alpha$ ,12 $\alpha$ -di-(((2-(Trimethylamino)Ethyl)Phosphoryl)Ethoxy)-Cholane (FA-7).** FA-7 was synthesized from **6** according to a procedure similar to the synthesis of FA-6, except that an additional hydrogenation step was conducted to remove the benzyl protective groups. Hydrogenation was conducted in MeOH in the presence of 10% Pd/C. FA-7 was purified by column chromatography as a white solid (65% over three steps).

$^1\text{H}$  NMR (400 MHz,  $\text{CD}_3\text{OD}$ )  $\delta$  = 4.25 (brs, 3 H), 4.05–3.95 (m, 4H), 3.76–3.53 (m, 5H), 3.53 (s, 1H), 3.41–3.38 (m, 1H), 3.31 (s, 2H), 3.25 (s, 1H), 3.04 (s, 18H), 2.20–1.02 (m, 23H), 0.92 (d,  $J$  = 6.0 Hz, 3H), 0.87 (s, 3H), 0.83 (t,  $J$  = 7.0 Hz, 3H), 0.66 (s, 3H);  $^{13}\text{C}$  NMR (100 MHz,  $\text{CD}_3\text{OD}$ ):  $\delta$  = 82.6, 77.6, 72.9, 69.2, 69.1, 68.8, 67.4, 67.4, 67.4, 67.1, 67.0, 66.9, 66.8, 60.9, 60.9, 54.9, 54.8, 44.2, 43.4, 40.9, 39.7, 39.6, 36.9, 36.5, 35.6, 31.5, 29.4, 28.8, 24.1, 23.3, 20.6, 18.6, 14.9, 13.0; HRMS: calculated for  $\text{C}_{38}\text{H}_{75}\text{N}_2\text{O}_{11}\text{P}_2^+$  [ $\text{M} + \text{H}^+$ ]: 797.4840, found 797.4860; IR = 3,322, 2,930, 2,867, 2,481, 2,221, 2,071, 1,688, 1,471, 1,377, 1,230, 1,085, 1,059  $\text{cm}^{-1}$ .



**Table S1. X-ray data collection statistics for Cx26/DDM, FA-3, and FA-5 complexes**

| Space group             | Cx26/FA-3<br>R32                                                                      | Cx26/FA-5<br>P213                                                          | Cx26/DDM<br>R32                                                                       |
|-------------------------|---------------------------------------------------------------------------------------|----------------------------------------------------------------------------|---------------------------------------------------------------------------------------|
| Unit cell dimension (Å) | $a = 156.1, b = 156.1,$<br>$c = 160.1; \alpha = \beta = 90^\circ, \gamma = 120^\circ$ | $a = 154.0, b = 154.0,$<br>$c = 154.0; \alpha = \beta = \gamma = 90^\circ$ | $a = 193.9, b = 193.9,$<br>$c = 365.5; \alpha = \beta = 90^\circ, \gamma = 120^\circ$ |
| Resolution (Å)          | 40.0–3.3                                                                              | 50.0–3.1                                                                   | 50.0–4.2                                                                              |
| Total observations      | 252,815                                                                               | 657,821                                                                    | 2,013,758                                                                             |
| Unique observations     | 9,762                                                                                 | 22,329                                                                     | 19,949                                                                                |
| Redundancy              | 5.5 (2.1)                                                                             | 5.3 (5.2)                                                                  | 18.1 (12.2)                                                                           |
| Completeness (%)        | 97.0 (70.0)                                                                           | 98.5 (99.9)                                                                | 100.0 (100.0)                                                                         |
| Mean $I/\sigma(I)$      | 25.1 (0.8)                                                                            | 9.8 (3.7)                                                                  | 18.6 (5)                                                                              |
| $R_{\text{merge}}$ (%)  | 8.0 (75.0)                                                                            | 16.1 (42.6)                                                                | 22.5 (62.8)                                                                           |

**Table S2. X-ray data collection statistics for EC-MsbA/FA-3 and EC-MsbA/FA-5 complex**

| Space group             | EC-MsbA/FA-3<br>P2 <sub>1</sub> 2 <sub>1</sub> 2 <sub>1</sub>            | EC-MsbA/FA-5<br>P2 <sub>1</sub> 2 <sub>1</sub> 2 <sub>1</sub>            |
|-------------------------|--------------------------------------------------------------------------|--------------------------------------------------------------------------|
| Unit cell dimension (Å) | $a = 115.44, b = 250.29, c = 284.95; \alpha = \beta = \gamma = 90^\circ$ | $a = 115.50, b = 248.19, c = 279.70; \alpha = \beta = \gamma = 90^\circ$ |
| Resolution (Å)          | 125.14–6.40                                                              | 121.51–5.59                                                              |
| Total observations      | 38,455                                                                   | 70,903                                                                   |
| Unique observations     | 15,504                                                                   | 24,239                                                                   |
| Redundancy              | 2.5                                                                      | 2.9                                                                      |
| Completeness (%)        | 88.7 (92.2)                                                              | 95.4 (89.2)                                                              |
| $I/\sigma(I)$           | 6.7 (2.4)                                                                | 8.7 (2.8)                                                                |
| $R_{\text{merge}}$ (%)  | 8.9 (42.9)                                                               | 6.5 (35.2)                                                               |

**Table S3. X-ray data collection statistics for bacteriorhodopsin (BR) crystallized in dimyristoylphosphatidylcholine (DMPC) : FA bicelles**

|                                   | BR/FA-4:DMPC<br>(Protein Data<br>Bank ID code<br>4HYX) | BR/FA-7:DMPC<br>(Protein Data<br>Bank ID code<br>4HWL) |
|-----------------------------------|--------------------------------------------------------|--------------------------------------------------------|
| Data collection                   |                                                        |                                                        |
| Space group                       | P21                                                    | P21                                                    |
| Unit cell dimension               |                                                        |                                                        |
| $a, b, c$ (Å)                     | 45.89, 112.92, 56.29                                   | 46.16, 113.29, 56.19                                   |
| $\beta$ (°)                       | 113.83                                                 | 114.27                                                 |
| Resolution (Å)                    | 56.46 (2.00)                                           | 46.67 (2.00)                                           |
| $R_{\text{merge}}$                | 7.4 (39.9)                                             | 7.4 (55.0)                                             |
| $I/\sigma(I)$                     | 5.3 (1.1)                                              | 6.5 (1.7)                                              |
| Completeness (%)                  | 92.6 (86.0)                                            | 96.6 (95.1)                                            |
| Redundancy                        | 2.1 (2.1)                                              | 2.1 (2.1)                                              |
| Refinement                        |                                                        |                                                        |
| Resolution (Å)                    | 46.85–1.99                                             | 42.08–2.00                                             |
| Number of reflections             | 32,391                                                 | 33,257                                                 |
| $R_{\text{work}}/R_{\text{free}}$ | 0.181/0.218                                            | 0.159/0.172                                            |
| Number of atoms                   |                                                        |                                                        |
| Protein                           | 3,560                                                  | 3,512                                                  |
| Ligand/ion                        | 172                                                    | 91                                                     |
| Water                             | 33                                                     | 32                                                     |
| rmsds                             |                                                        |                                                        |
| Bond lengths (Å)                  | 0.022                                                  | 0.021                                                  |
| Bond angles (°)                   | 2.003                                                  | 1.881                                                  |

**Table S4. Crystallization statistics for P450s in various FAs**

|                               | FA-3         | FA-4                      | FA-6          | FA-7                      | Without FA            |
|-------------------------------|--------------|---------------------------|---------------|---------------------------|-----------------------|
| CYP24A1 (1)                   | 2.5 Å (3K9Y) | N.T.                      | 3.4 Å         | N.T.                      | >3.0 Å                |
| CYP2B4 (2)                    | N.T.         | 1.76 Å (3MVR)             | N.T.          | Crystals*                 | Unsuccessful          |
| CYP2B4-ticlopidine (3)        | Crystals*    | 2.67 Å (3KW4)             | N.T.          | Crystals*                 | N.T.                  |
| CYP2B4-clopidogrel (3)        | Crystals*    | No crystal                | N.T.          | 3.1 Å (3ME6)              | N.T.                  |
| CYP2B4-tBPA (inactivator) (4) | N.T.         | 3.5/3.0 Å (3R1A and 3R1B) | N.T.          | N.T.                      | Unsuccessful          |
| CYP2B4-amlodipine (5)         | N.T.         | No crystal                | N.T.          | 2.25 Å (3TMZ)             | N.T.                  |
| CYP2B4-4-CPI (6)              | N.T.         | No crystal                | 2.80 Å (3TK3) | No crystal                | N.T.                  |
| CYP2B6-4-CPI (7)              | Crystals*    | 2.0 Å (3IBD)              | N.T.          | Crystals*                 | Crystals <sup>†</sup> |
| CYP2B6-4-BP/4-NBP (8)         | N.T.         | Crystals*                 | N.T.          | 2.1/2.8 Å (3QOA and 3QU8) | Unsuccessful          |
| CYP2B6-amlodipine (5)         | N.T.         | No crystal                | N.T.          | 2.8 Å (3UA5)              | N.T.                  |

The four-digit Protein Data Bank ID codes were included in parenthesis with the resolution data for reported structures. N.T., not tested.

\*Poor diffraction (>6 Å) in the preliminary screening relative to other FA candidates.

<sup>†</sup>Needle crystals, no diffraction.

- Annalora AJ, et al. (2010) Crystal structure of CYP24A1, a mitochondrial cytochrome P450 involved in vitamin D metabolism. *J Mol Biol* 396(2):441–451.
- Wilderman PR, et al. (2010) Plasticity of cytochrome P450 2B4 as investigated by hydrogen-deuterium exchange mass spectrometry and X-ray crystallography. *J Biol Chem* 285(49):38602–38611.
- Gay SC, et al. (2010) Structures of cytochrome P450 2B4 complexed with the antiplatelet drugs ticlopidine and clopidogrel. *Biochemistry* 49(40):8709–8720.
- Gay SC, et al. (2011) Structural analysis of mammalian cytochrome P450 2B4 covalently bound to the mechanism-based inactivator tert-butylphenylacetylene: Insight into partial enzymatic activity. *Biochemistry* 50(22):4903–4911.
- Shah MB, et al. (2012) Conformational adaptation of human cytochrome P450 2B6 and rabbit cytochrome P450 2B4 revealed upon binding multiple amlodipine molecules. *Biochemistry* 51(37):7225–7238.
- Wilderman PR, et al. (2012) Investigation by site-directed mutagenesis of the role of cytochrome P450 2B4 non-active-site residues in protein-ligand interactions based on crystal structures of the ligand-bound enzyme. *FEBS J* 279(9):1607–1620.
- Gay SC, et al. (2010) Crystal structure of a cytochrome P450 2B6 genetic variant in complex with the inhibitor 4-(4-chlorophenyl)imidazole at 2.0-Å resolution. *Mol Pharmacol* 77(4):529–538.
- Shah MB, Pascual J, Zhang Q, Stout CD, Halpert JR (2011) Structures of cytochrome P450 2B6 bound to 4-benzylpyridine and 4-(4-nitrobenzyl)pyridine: Insight into inhibitor binding and rearrangement of active site side chains. *Mol Pharmacol* 80(6):1047–1055.
